# Supplementary material
Source: PubMed Central journal article supplement (PMC5393923)
Supplement: NIHMS845619-supplement-01.pdf [file NIHMS845619-supplement-01.pdf]

# Supplementary Figure 1

**A**

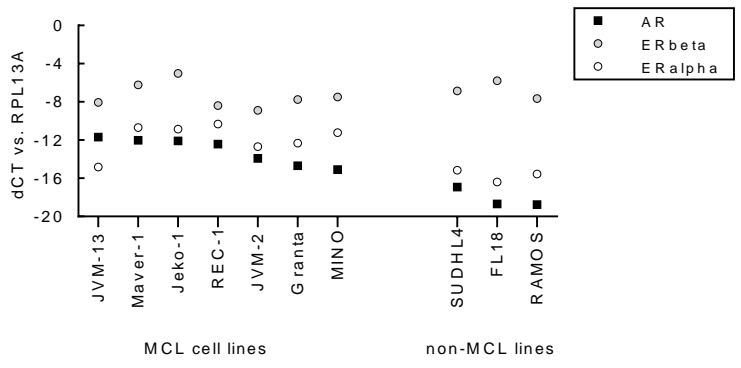

**B**

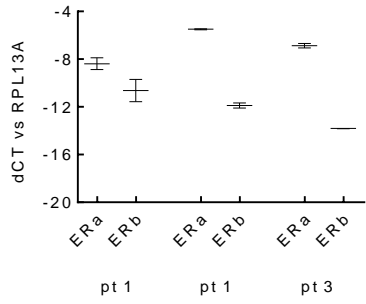

# Supplementary Table 1

Table S1. Characteristics of MCL tumors used for androgen receptor IHC

| Case number | Male or Female | Age (yr) | Diagnosis or Relapse | Tumor Biopsy Site |
|-------------|----------------|----------|----------------------|-------------------|
| 1           | F              | 59       | D                    | SPLEEN            |
| 2           | M              | 72       | R                    | SPLEEN            |
| 3           | F              | 53       | R                    | LN                |
| 4           | M              | 64       | R                    | PALATE            |
| 5           | M              | 60       | D                    | LN                |
| 6           | M              | 70       | D                    | LN                |
| 7           | F              | 46       | R                    | BREAST            |
| 8           | M              | 71       | R                    | LN                |
| 9           | M              | 66       | R                    | SKIN              |
| 10          | F              | 46       | R                    | LN                |
| 11          | M              | 60       | R                    | LN                |
| 12          | M              | 57       | D                    | COLON             |
